# Supplementary material for: Host tissue proteomics reveal insights into the molecular basis of Schistosoma haematobium-induced bladder pathology
Source: PubMed Central journal article supplement (PMC8846513; doi:10.1371/journal.pntd.0010176), 2022-02-15
Supplement: pntd.0010176.s004.pdf [file pntd.0010176.s004.pdf]

**S1 Table. Samples and their corresponding TMT tag channels.**

| Sample # | Sample Name | Tag Channel |
|----------|-------------|-------------|
| 1        | T1          | 126         |
| 2        | T2          | 127N        |
| 3        | T3          | 127C        |
| 4        | T4          | 128N        |
| 5        | T5          | 128C        |
| 6        | Sh1         | 129N        |
| 7        | Sh2         | 129C        |
| 8        | Sh3         | 130N        |
| 9        | Sh4         | 130C        |
| 10       | Sh5         | 131         |
