# Supplementary material for: Host tissue proteomics reveal insights into the molecular basis of Schistosoma haematobium-induced bladder pathology
Source: PubMed Central journal article supplement (PMC8846513; doi:10.1371/journal.pntd.0010176), 2022-02-15
Supplement: pntd.0010176.s005.pdf [file pntd.0010176.s005.pdf]

**S2 Table. High pH reverse phase HPLC fractionation gradient information**

| Time [min] | Flow [ml/min] | %B   |
|------------|---------------|------|
| 0.00       | 0.500         | 2.0  |
| 1.00       | 0.500         | 6.0  |
| 12.00      | 0.500         | 20.0 |
| 30.00      | 0.500         | 28.0 |
| 50.00      | 0.500         | 65.0 |
| 53.00      | 0.500         | 98.0 |
| 57.00      | 0.500         | 98.0 |
| 59.00      | 0.500         | 2.0  |
| 60.00      | 0.500         | 2.0  |

*%B, Mobile phase B (Acetonitrile (Optima™, LC/MS grade, Fisher Chemical™) with 20mM Formic Acetate, pH 9.3).*
