# Supplementary material for: Host tissue proteomics reveal insights into the molecular basis of Schistosoma haematobium-induced bladder pathology
Source: PubMed Central journal article supplement (PMC8846513; doi:10.1371/journal.pntd.0010176), 2022-02-15
Supplement: pntd.0010176.s006.pdf [file pntd.0010176.s006.pdf]

**S3 Table. nanoLC-MS gradient information**

| Time[min] | Flow[ $\mu$ l/min] | %B    |
|-----------|--------------------|-------|
| 0.00      | 0.300              | 2.0   |
| 3.00      | 0.300              | 2.0   |
| 3.10      | 0.300              | 2.0   |
| 8.00      | 0.300              | 4.0   |
| 108.00    | 0.300              | 35.0  |
| 128.00    | 0.300              | 65.0  |
| 129.00    | 0.300              | 100.0 |
| 133.00    | 0.300              | 100.0 |
| 134.00    | 0.300              | 2.0   |
| 140.00    | 0.300              | 2.0   |
| 150.00    | 0.300              | 2.0   |

*%B, Mobile phase B (Acetonitrile (Optima<sup>TM</sup>, LC/MS grade, Fisher Chemical<sup>TM</sup>) with 20mM Formic Acetate, pH 9.3.*
