# Supplementary material for: Host tissue proteomics reveal insights into the molecular basis of Schistosoma haematobium-induced bladder pathology
Source: PubMed Central journal article supplement (PMC8846513; doi:10.1371/journal.pntd.0010176), 2022-02-15
Supplement: pntd.0010176.s017.pdf [file pntd.0010176.s017.pdf]

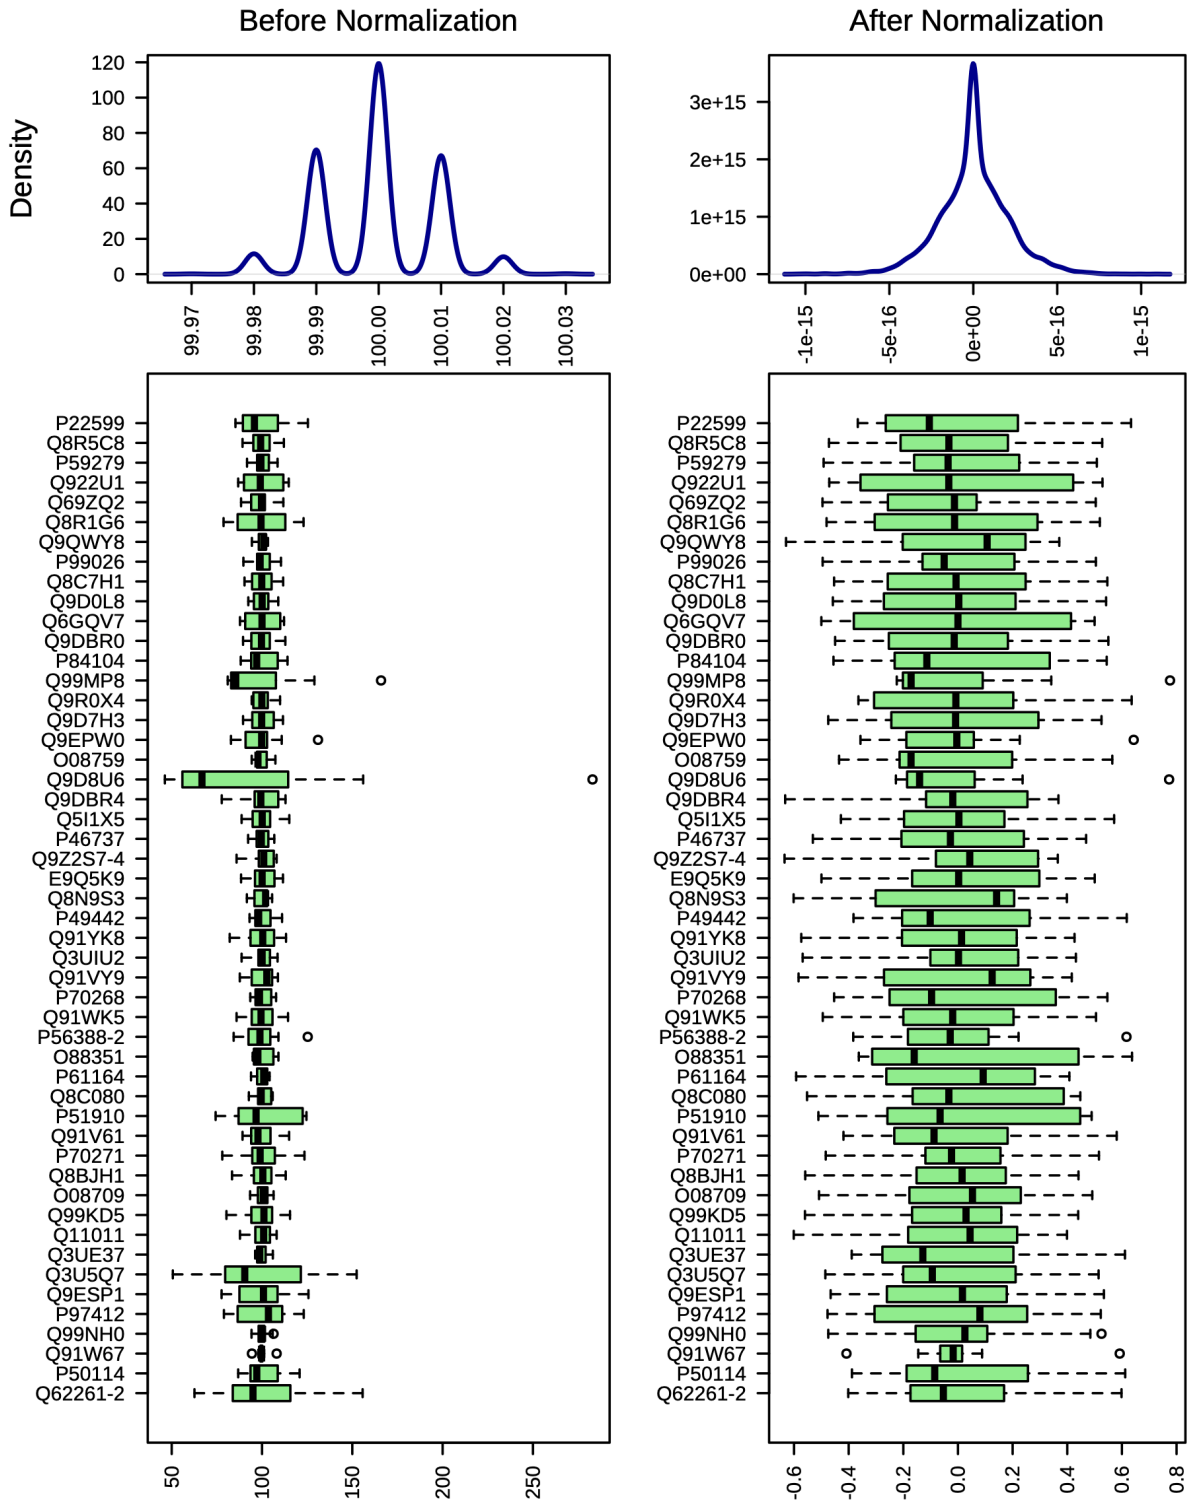

Box plots and kernel density plots before and after normalization (Range scaling) of dataset with all samples (n=10; Cases=5, Controls=5). The boxplots show a maximum of 50 proteins due to space limit. The density plots are based on all samples before and after normalization.
