# Supplementary material for: Host tissue proteomics reveal insights into the molecular basis of Schistosoma haematobium-induced bladder pathology
Source: PubMed Central journal article supplement (PMC8846513; doi:10.1371/journal.pntd.0010176), 2022-02-15
Supplement: pntd.0010176.s019.pdf [file pntd.0010176.s019.pdf]

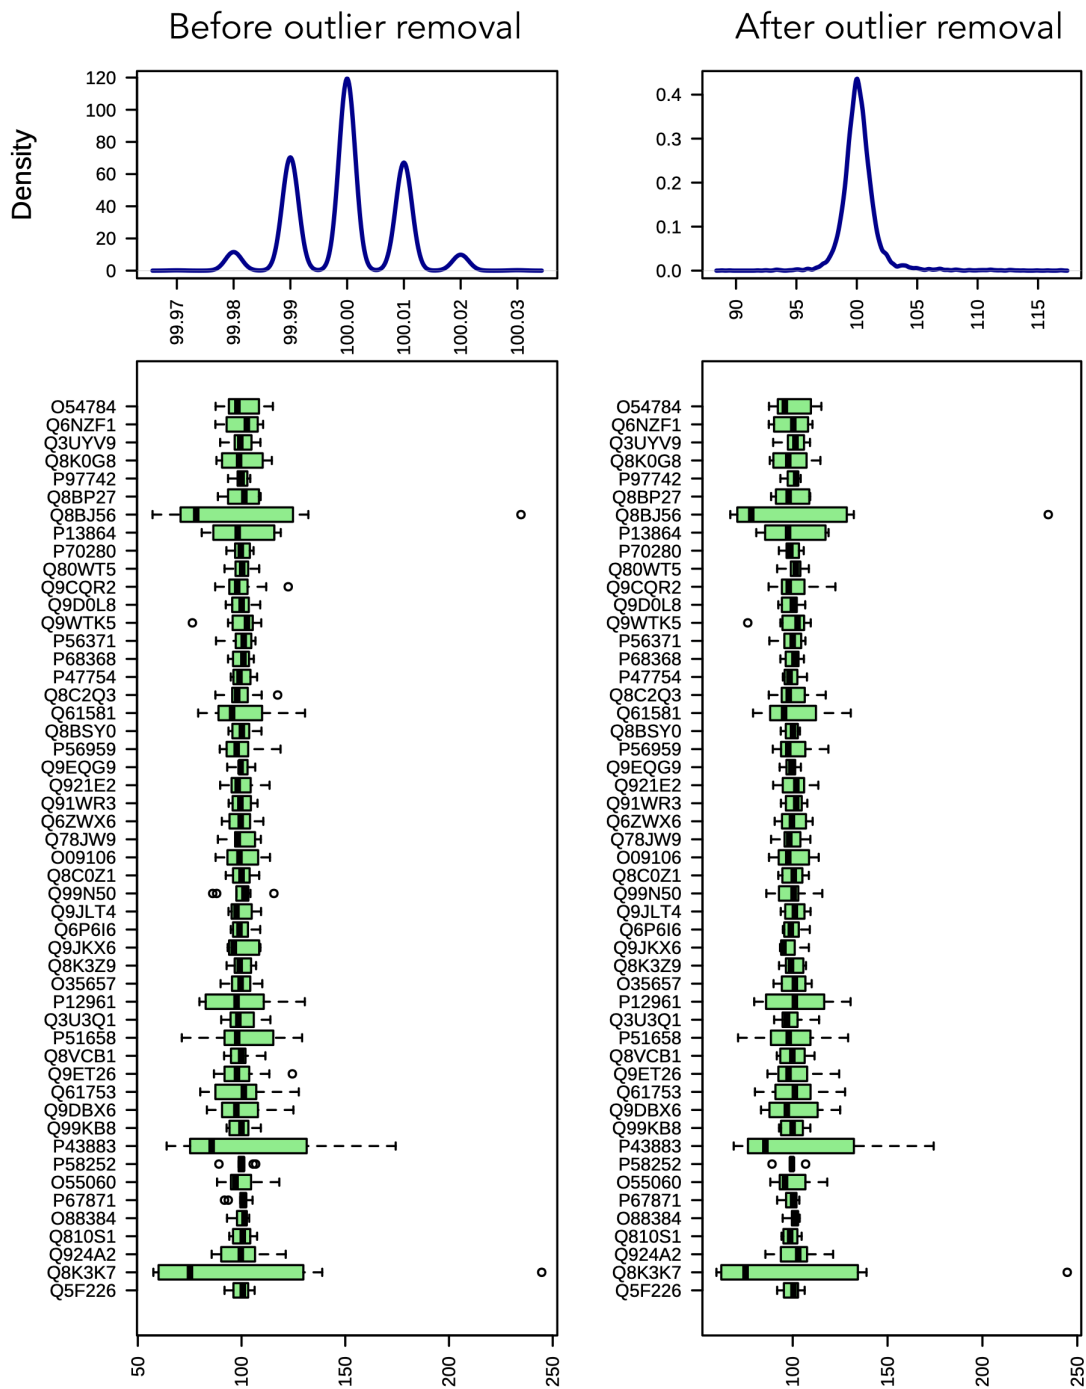

Box plots and kernel density plots before ( $n=10$ ; Cases=5, Controls=5) and after ( $n=8$ ; Cases=4, Controls=4) removal of outliers from dataset. The boxplots show a maximum of 50 proteins due to space limit. The density plots are based on all samples before and after outlier removal.
